# Supplementary material for: Adaptation of Two Wild Bird-Origin H3N8 Avian Influenza Viruses to Mammalian Hosts
Source: MDPI journal article supplement (doi:10.3390/v14051097), 2022-05-19
Supplement: s1 [file s1]

**Table S1.** Virus replication in tissues and organs of the chickens in the inoculated groups.

| Strains | Heart            | Liver | Spleen | Lung | Kidney | Brain | Trachea | Thymus | Pancreas | Bursa of<br>Fabricius | Cecum<br>Tonsil |
|---------|------------------|-------|--------|------|--------|-------|---------|--------|----------|-----------------------|-----------------|
| GZA1    | 0/3              | 0/3   | 0/3    | 0/3  | 0/3    | 0/3   | 0/3     | 0/3    | 0/3      | 0/3                   | 0/3             |
| XJ47    | 2/3 <sup>a</sup> | 2/3   | 2/3    | 3/3  | 1/3    | 1/3   | 2/3     | 1/3    | 1/3      | 2/3                   | 2/3             |

<sup>a</sup> Positive numbers of inoculated embryonic chicken eggs.

**Table S2.** Seroconversion numbers of the AIV-infected chickens at 14 dpi.

| Strains | Inoculated groups | Contact groups |
|---------|-------------------|----------------|
| GZA1    | 6/6               | 0/6            |
| XJ47    | 5/6               | 3/3            |

<sup>a</sup> Positive numbers of inoculated embryonic chicken eggs.
